# Supplementary material
Source: PubMed Central journal article supplement (PMC3172800)

**Table S1. Clinical information about CML patient samples used in this study**

| <b>Sample number</b> | <b>Sample type</b> | <b>Primary diagnosis</b> | <b>Point in treatment</b> | <b>Phase</b>  |
|----------------------|--------------------|--------------------------|---------------------------|---------------|
| 1                    | PBMC               | CML                      | Pre-treatment             | Chronic phase |
| 2                    | PBMC               | CML                      | Pre-treatment             | Chronic phase |
| 3                    | PBMC               | CML                      | Active treatment          | Chronic phase |

PBMC, peripheral blood mononuclear cell

**Table S2. Oligo ID numbers for shRNAs obtained from Open Biosystems**

| <b>Gene symbol (species)</b> | <b>Oligo ID</b> |
|------------------------------|-----------------|
| <i>Atf5</i> (mouse)          | TRCN0000075555  |
| <i>ATF5</i> (human)          | TRCN0000017638  |
| <i>Foxo1</i>                 | TRCN0000054882  |
| <i>Foxo3A</i>                | TRCN0000071616  |
| <i>Foxo4</i>                 | TRCN0000071562  |

**Table 3S. Primer sequences for qRT-PCR**

| <b>Gene symbol</b> | <b>Forward primer (5' → 3')</b> | <b>Reverse primer (5' → 3')</b> |
|--------------------|---------------------------------|---------------------------------|
| <i>Akt1</i>        | CTTCTATGGTGCGGAGATTGTG          | CCCGGTACACCACGTTCTTC            |
| <i>Atf5</i>        | GGGTCATTTTAGCTCTGTGAGAGAA       | ATTTGTGCCATAACCCCTAGA           |
| <i>Atg3</i>        | CATCACTTACGACAAATATTACCAGACA    | CTGCCGTTGCTCATCATAGC            |
| <i>Atg4a</i>       | TCACACTGGCCTCCCTTTG             | GCCCTGTGGTTGTCACCTC             |
| <i>Atg4b</i>       | GGGCCTGCTCTGCTCATG              | GGCAGTCTGACTCCAAGCATT           |
| <i>Atg4c</i>       | CTAATGGAACACTACATCAACTGCAA      | CAATGGGCTCAGGGAGAAAA            |
| <i>Atg4d</i>       | GGGCTCCAGGGCACTCA               | GGACCAGTGACCCAATGCA             |
| <i>Atg5</i>        | ACTGCTTCGCTGAGACACACA           | GCTTCGGCTGCATTGCAT              |
| <i>Atg7</i>        | CAGCCAGCAAGCGAAAGC              | TCTCATGACAACAAAGGTATCAAACC      |
| <i>Atf9a</i>       | GAGATCATAGACTTCTTCCGCAACT       | GAACGTCCATCTGAGCAAAGG           |
| <i>Atg9b</i>       | CCAGCTGCAGGAAATTTGATG           | AAATAGGAATGGAGCTCAGAAGATG       |
| <i>Atg10</i>       | ATAGGCGATGGCTGGGAAT             | TTTGCACATGTAGCCATCAGAAC         |
| <i>Atg12</i>       | GGTCTTGCGCCTCATCCT              | GGTGTCTGAGCGCTGAGA              |
| <i>Atg16l1</i>     | CAGCCGAGGGTTCTCTTTATGT          | TGTTTTGAAAGAACCCTTCTCCACTT      |
| <i>Atg16l2</i>     | GACAGGTGTTTCAGGGCAGATG          | GGGCTGAACACAGCTTTGGT            |
| <i>Bad</i>         | CAGGGAGAAGAGCTGACGTACA          | CCCTCCGTGGCTATTGCA              |
| <i>Bak1</i>        | CCGGGAATGCCTACGAACT             | CCAGCTGATGCCACTCTTAAATAG        |
| <i>Bax</i>         | AGGATGCGTCCACCAAGAAG            | CCATATTGCTGTCCAGTTCATCTC        |
| <i>Bbc3</i>        | ACGACCTCAACGCGCAGTA             | AGGAGTCCCATGAAGAGATTGTACA       |
| <i>Bcl2</i>        | AAGGGCTTCACACCCAAATCT           | TTCTACGTCTGCTTGGCTTTGA          |
| <i>Bcl2a1a</i>     | TCAAGTAACTACGGACCAGAGAGA        | AAATGCCAAGTGCTGATAACCA          |
| <i>Bcl2l1</i>      | GAGCCATTGAGTGAGGTGCTTT          | TCCAAGCAGCCTGAATTC              |
| <i>Bcl2l2</i>      | GCTCTCAAAGCCCAAAGG              | GTGCCACTTGCCTCTT                |
| <i>Bcl2l1l</i>     | GCCGGTGAGATACCCTAAGATG          | ATGGGTTTGATGGGTATTTTCTTAGA      |
| <i>Bcl2l12</i>     | CCCGCCTTGTGGAACCTCTT            | ACGGGCTGGAGCAATTTG              |
| <i>Becn1</i>       | GGACAAGCTCAAGAAAACCAATG         | TGTCCGCTGTGCCAGATGT             |
| <i>Bid</i>         | CAAGCCGATGGTGACACT              | TTCAGGCCAAGGTCTTTCCA            |
| <i>Bik</i>         | TCATACAGGTTTTCTGGGTTTTTG        | CTTAGCCAGTAATGCTCCTGAGGTA       |
| <i>Bmf</i>         | CGGCTTCATACGCAACAACA            | GGGCGAGGTTTTGAAGGAA             |
| <i>Bnip3</i>       | CCCACGAACCCACTTTG               | GACAGCAAGGCGAGAATCCT            |
| <i>Bnip3l</i>      | GCAGGCTTCGTTTTAAGTTTATTGA       | TGCCGCTTTCCTCTTGACTTAT          |
| <i>Cdkn2a</i>      | CTCAACTACGGTGACAGATTCGA         | CACCGGGCGGGAGAAG                |
| <i>Cdkn1b</i>      | TCTTCGGCCCCGGTCAAT              | CATATCCCGGCAGTGCTTCT            |
| <i>Ctsb</i>        | TCCATGCCCCAGTAATCCA             | GGCCAGTTCAGTGGTCCATT            |
| <i>Ctss</i>        | GCTGTGGAGGCGGCTACAT             | CTGCCTCTATGCCCCATT              |
| <i>Cxcr4</i>       | TCGGCAATGGATTGGTGAT             | CCGTCATGCTCCTTAGCTTCTT          |
| <i>Dapk1</i>       | TGGTGGCCAAACACAACGT             | CACTGGGCTAGGGAGGAAATC           |
| <i>Eif2ak3</i>     | ACCGTGGACGGCAATGAC              | AGAAGCTTCGGACGGACAAA            |
| <i>Eif4g1</i>      | GGGCAAAGCTACTTCTTTATTGCT        | CCTTTTTGGGACCCATGCT             |
| <i>Esr1</i>        | AGCCTTGTCTCTTCCCTGATGTC         | TGTGACTGCCCTTGATCAATCT          |

|                        |                           |                           |
|------------------------|---------------------------|---------------------------|
| <i>Fadd</i>            | CCACACTTGGAGCCCAATAAA     | TTATCACACCCAGCCAAAGGT     |
| <i>Fas</i>             | TTCTCCTGGCTGTGAACACTGT    | CACGGCTCAAGGGTTCCAT       |
| <i>Foxo1</i>           | TTCAGCAGCAACCCCTGTTT      | AGACAAGTGGCCATGATTCACA    |
| <i>Foxo3a</i>          | TGGTGCTAAGCAGGCCTCAT      | CCCCTTTCCTCAGTGATCCTT     |
| <i>Foxo4</i>           | CGGCTGTCGCCAATGAG         | CCGAGGCTGGCATTTCCT        |
| <i>Hdac1</i>           | GTGGCTACACCATCCGGAAT      | GGCCACCGCTGTTTCGTA        |
| <i>Hrk</i>             | TTTTTCCTGGTTGGATTTGCA     | TGCTTTCTAGCAGACCCTCTGAT   |
| <i>Hsp90aa1</i>        | AGCAAACATGGAGAGAATCATGAA  | CTGCCATGTAACCCATTGTTGA    |
| <i>Hspa8</i>           | CCATTACCCGGGCTCGAT        | CCAGTGTGCCACGGAACA        |
| <i>Htt</i>             | GGGCAGGAAGCCGTCAT         | GCGACTCGAAAGCCTTCATC      |
| <i>Ifna2</i>           | GGACAGGCAGGACTTTGGATT     | GCCTTCTGGATCTGCTGGTTA     |
| <i>Mcl1</i>            | CTGGCTTTTGCGGGTGTT        | TTGGTGGCTGGAGCTTTAAGA     |
| <i>mTOR</i><br>(mouse) | CCAACCAGCCAATCATTCG       | GCTTGGATGTGATGACTTGCA     |
| <i>mTOR</i><br>(human) | GGATGTTCCAACGCAAGTTGA     | GCAGAGGTTTTTCATGGGATGTC   |
| <i>Pmaip1</i>          | TTTCCCACCGTAAAGCGACTA     | CATCACTTCTGGTAGGCATCAAGA  |
| <i>Tgfb1</i>           | CCAGCCGCGGGACTCT          | TTCCGTTTCACCAGCTCCAT      |
| <i>Tnf</i>             | CACCGTCAGCCGATTTGC        | TTGACGGCAGAGAGGAGGTT      |
| <i>Trp53</i>           | TGGACCCTGGCACCTACAAT      | GGAAAGTAGGCCCTGGAGGAT     |
| <i>Trp73</i>           | CAAGTCTAAAACGCCGAGCAT     | CTGCACTCCCACGGCTATG       |
| <i>Pten</i>            | CAGAGCAAGCTCAGTGTGGGTAT   | ACTCAAAGGGTGACCAAATTCTCTA |
| <i>Rab24</i>           | TTGATGCATTTCTTGCTGTGT     | ACGTGGCCCCAGGAACA         |
| <i>Rb1</i>             | GTCTGCCAACACCCACAAAA      | GATGTCCCAAATGATTCACCAATT  |
| <i>Sqstm1</i>          | GGAGGCACCCCGAAACA         | GCCCGTTGCAACCATCAC        |
| <i>Tsc1</i>            | CTCCTGCCTCTGCTCACACA      | CTGGTTTGCCAGGGAGTCAA      |
| <i>Tsc2</i>            | CACCTACAGCCGGTCATCCT      | GCAGCAAGCTCCTCCAAATG      |
| <i>Uvrags</i>          | GAACGAGAGACTCCAGTACAAAACC | CCGGGCTGTGTCAATGCT        |
| <i>Zbtb24</i>          | TGGGCAGTGAGGAACATGTC      | CCGGGAGGTGGAGAATGG        |

**Table S4. Primer sequences for ChIP analysis of the *mTOR* and *ATF5* promoters**

| <b><i>mTOR</i><br/>promoter<br/>region (bp)</b> | <b>Forward primer (5' → 3')</b> | <b>Reverse primer (5' → 3')</b> |
|-------------------------------------------------|---------------------------------|---------------------------------|
| 163 – 265                                       | GTGTGGAGGGGACTTGTAGTAGC         | AAGGAGGCGAAGGACTATTCC           |
| 490 – 567                                       | GTAGTTCGGTGATCATCTTATCCTG       | TGTTTTTTTTTATTCTCACTGTCCC       |
| 908 – 1003                                      | TTATATATTGGAGCAGGTTCTCTGG       | TGGTGGTGGAGGTTTAGAGGG           |
| 1560 – 1666                                     | CTACATAGCAAGTTTTAGGCCATCC       | GGTGTTCCTCTAAGTTGGCTGTTC        |
| 2124 – 2227                                     | AGGCTGGGCAAGGAGGTG              | TTTCTTAGGGCCTCCTATTTGTG         |
| 2597 – 2693                                     | CTGGAATTACAAGCATTACCC           | GGGTTGGGATGTAGCTCAGATAG         |
| <b><i>ATF5</i><br/>promoter<br/>region (bp)</b> |                                 |                                 |
| -3562 – -3797                                   | TGGTACAGAAGCATGAGGCCA           | AGGGACAGGAGTTGGAGGTGT           |
| -3165 – -3269                                   | GATGAAGACTCACCCTTCCCT           | TACTTGTCTTCCCAGTGTGAG           |
| -2447 – -2562                                   | TTCCAAGCAGCTCCACCCTTG           | CTCTCTTCCTAACCCTCACCC           |
| -1587 – -1683                                   | CCCATCCAAGGGGAATTATC            | CTGGTGTCCATCCCTGGTACT           |
| -880 – -1106                                    | CCCAATCCATGTGGTGCTTGG           | GGGATGATGCGTGAACCCTGT           |
| -434 – -599                                     | AGCAGTGGGTAAAGGCTGCCA           | AGGCCACGAAGTCCTAACCCAC          |
| 834 – 1055                                      | GGATCTGTGTGTGTGACACTG           | TCCTCCCTCAACACAGAAACC           |

**Figure S1. An ATF5 doublet is evident on 15% but not 10% SDS-polyacrylamide gels.** Cell lysates prepared from 32D/BCR-ABL or K562 cells were resolved by either 10% or 15% SDS-PAGE. In an immunoblot ATF5 is a doublet, which is evident on 15% but not 10% SDS-PAGE gels. The variable appearance of the doublet in this manuscript is a reflection of the fact that some of the experiments were run on 10% gels and others on 15% gels. As indicated, the size of the major ATF5 band is ~35 kDa.

**Figure S2. siRNA-mediated knockdown efficiency of ATF5 in 32D and 32D/BCR-ABL cells.** Immunoblot analysis of ATF5 levels in 32D or 32D/BCR-ABL treated with a luciferase or ATF5 siRNA.  $\beta$ -actin (ACTB) was monitored as a loading control.

**Figure S3. Representative FACS plots analyzing the effect of ATF5 knockdown.** 32D or 32D/BCR-ABL cells were treated with a luciferase or ATF5 siRNA and monitored for cell death by annexin V-PE/7-AAD staining.

**Figure S4. ATF5 does not regulate autophagy in 32D cells.** 32D cells treated with either a NS or ATF5 shRNA were monitored for expression of LC3B by immunoblot analysis. ACTB was monitored as a loading control. The level of LC3B-II induction was quantified by measuring the intensity of the LC3B-II signal in the immunoblots and normalizing to ACTB levels.

**Figure S5. Knockdown of ATF5 in BCR-ABL-transformed cells induces autophagy**

Quantification of the results presented in Figure 2B. Error bars represent SD. Single asterisks indicate  $p < 0.05$ .

**Figure S6. Schematic diagram of the autophagic process.** Autophagy is a

dynamic process that involves the formation of autophagosomes and their subsequent fusion with lysosomes to form autolysosomes. The schematic diagram indicates the pH as well as the presence or absence of LC3B-II and p62 in each of these three compartments. N/A, not applicable. Following fusion of the autophagosome and lysosome, the contents of the autolysosome are degraded by lysosomal enzymes, which indicates the completion of autophagy.

**Figure S7. Imatinib induces autophagy in K562 cells.** K562 cells stably

expressing EGFP-LC3B or, as a control, EGFP were treated with DMSO or imatinib (10  $\mu$ M for 24 h) and then visualized under an inverted fluorescence microscope. Representative images are shown (left panel). Quantification of the results for the EGFP-LC3B expressing cells (right panel). Error bars represent SD. Single asterisks indicate  $p < 0.05$ .

**Figure S8. Imatinib treatment induces autophagy in 32D/BCR-ABL cells**

Immunoblot analysis monitoring LC3B levels in 32D/BCR-ABL cells treated in the absence or presence of imatinib (5  $\mu$ M for 24 h). ACTB was monitored as a loading control. The level of LC3B-II induction was quantified by measuring the intensity of the LC3B-II signal in the immunoblots and normalizing to ACTB levels.

**Figure S9. Viability of K562 cells following treatment with a low dose of imatinib.** K562 cells were treated with 5  $\mu$ M imatinib for 48 h. Cell viability was monitored by an MTT assay. Error bars represent SD. Double asterisks indicate  $p > 0.05$ .

**Figure S10. Ectopic expression of ATF5 in 32D cells does not antagonize autophagy induced by IL-3 withdrawal.** Immunoblot analysis of LC3B levels in 32D cells stably expressing FLAG or FLAG-ATF5 in the absence or presence of IL-3 and the apoptosis inhibitor zVAD (100  $\mu$ M for 24 h). The results show that ectopic ATF5 expression does not inhibit IL-3-withdrawal induced autophagy in 32D cells in the presence or absence of zVAD. The level of LC3B-II induction was quantified by measuring the intensity of the LC3B-II signal in the immunoblots and normalizing to ACTB levels.

**Figure S11. Knockdown of FOXO1 or FOXO3A does not prevent the loss of ATF5 expression following PI3K/AKT inhibition.** (A) Knockdown efficiency of FOXO1, FOXO3A and FOXO4 in 32D/BCR-ABL cells. 32D/BCR-ABL cells were transduced with viruses expressing either a non-silencing (NS), FOXO1, FOXO3A or FOXO4 shRNA, and target gene expression was monitored by qRT-PCR. (B) 32D/BCR-ABL cells expressing a NS, FOXO1 or FOXO3A shRNA were treated with 20  $\mu$ M LY294002 for 18 h, and *Atf5* expression was monitored by qRT-PCR. Error bars represent SD. Single asterisks indicate  $p < 0.05$ ; double asterisks indicate  $p > 0.05$ .

**Figure S12. siRNA-mediated knockdown of ATF5 decreases expression of mTOR.** qRT-PCR analysis monitoring expression of *mTOR* in 32D/BCR-ABL cells following



treatment with an ATF5 siRNA or, as a control, a luciferase siRNA. Error bars represent SD. Single asterisks indicate  $p < 0.05$ .

**Figure S13. Ethidium bromide-stained gels from ChIP experiments**

**monitoring ATF5 binding to the *mTOR* promoter.** DNA was immunoprecipitated in the presence or absence of an ATF5 antibody. Input levels represent one-hundredth the levels loaded in the IP lanes. The results show that ATF5 binds to the *mTOR* promoter region ~1500-2200 bp upstream from the transcription start-site.

**Figure S14. Imatinib regulates expression of *ATF5* and *mTOR* in the absence**

**of apoptosis induction.** qRT-PCR analysis monitoring levels of *ATF5* and *mTOR* in K562 cells treated in the absence or presence of imatinib (10  $\mu$ M) and zVAD (100  $\mu$ M) for 24 h. Error bars represent SD. Single asterisks indicate  $p < 0.05$ .

**Figure S15. Analysis of FOXO4 binding to the *Atf5* promoter following**

**treatment with imatinib or LY294002.** 32D/BCR-ABL cells were treated with DMSO, imatinib (5  $\mu$ M for 24 h) or LY294002 (20  $\mu$ M for 24 h) and binding of FOXO4 to the *Atf5* promoter analyzed in a ChIP assay using a series of primer-pairs located in various regions of the *Atf5* promoter (see schematic at the bottom). Red lines indicate the position of putative FOXO-binding sites (predicted by TRANSFAC analysis); their positions and sequences are also indicated. Primer-pairs that encompass the predicted FOXO binding sites are indicated with a red asterisk. TSS, transcription start site. Error bars represent SD.

Figure S1

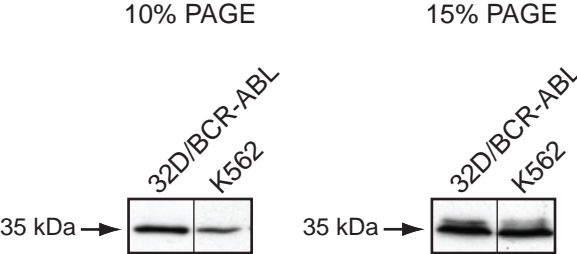

Figure S2

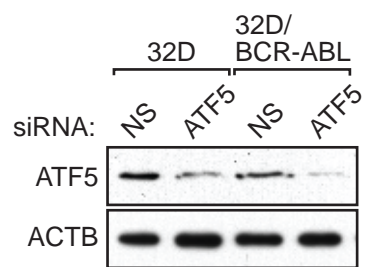

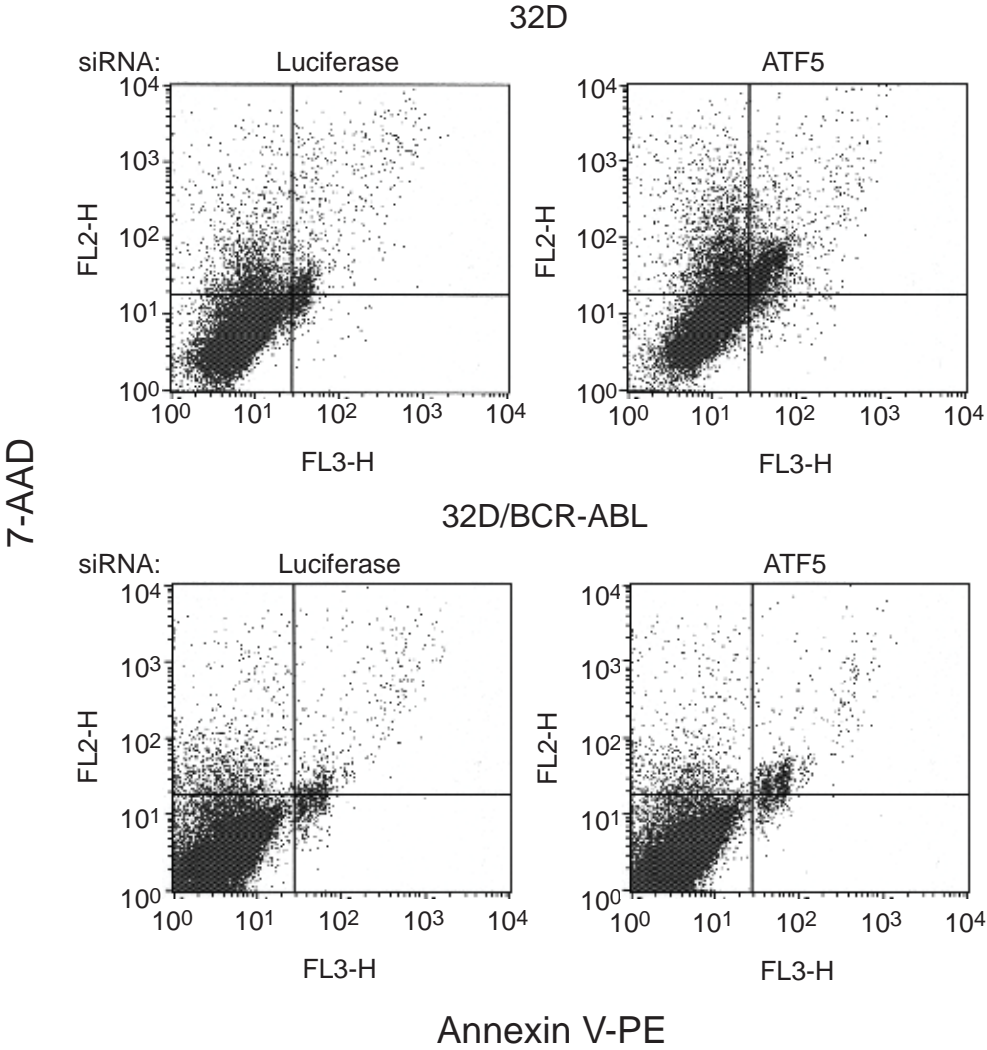

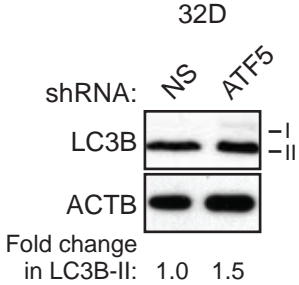

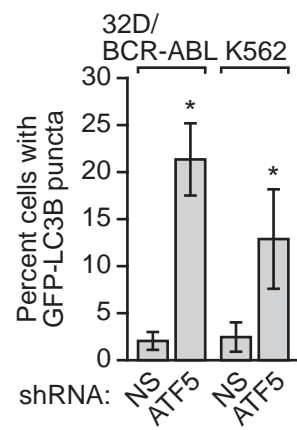

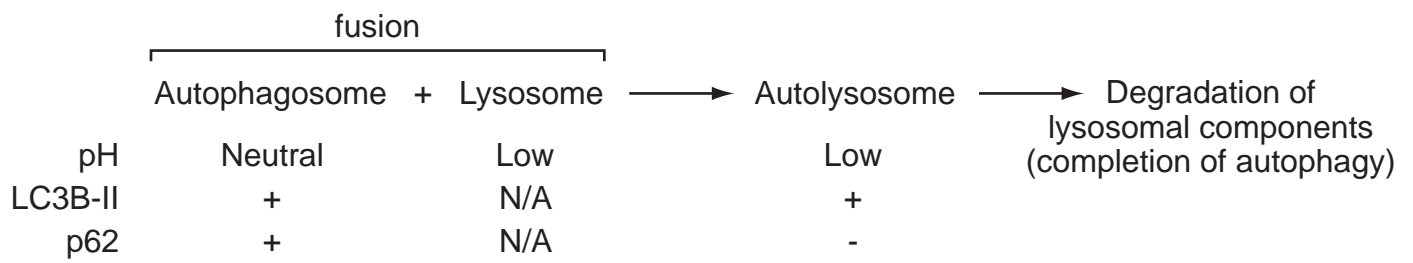

Figure S7

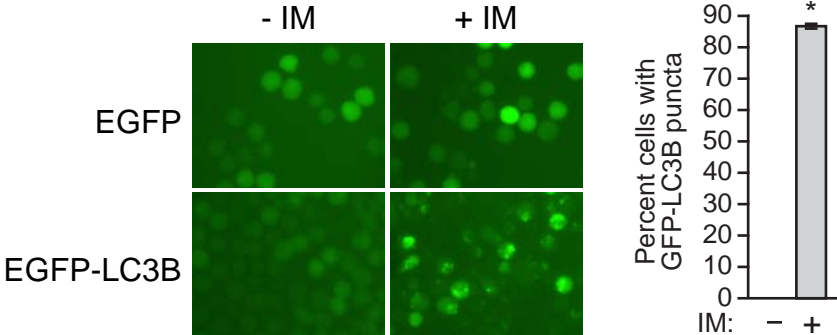



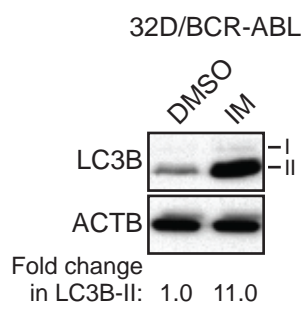

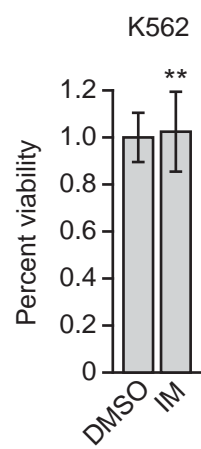

Figure S10

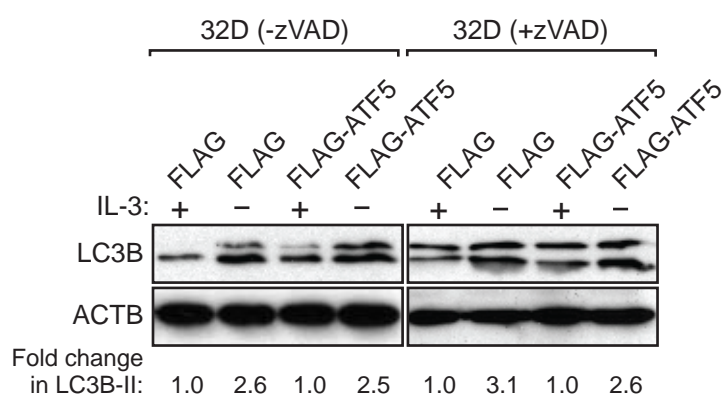

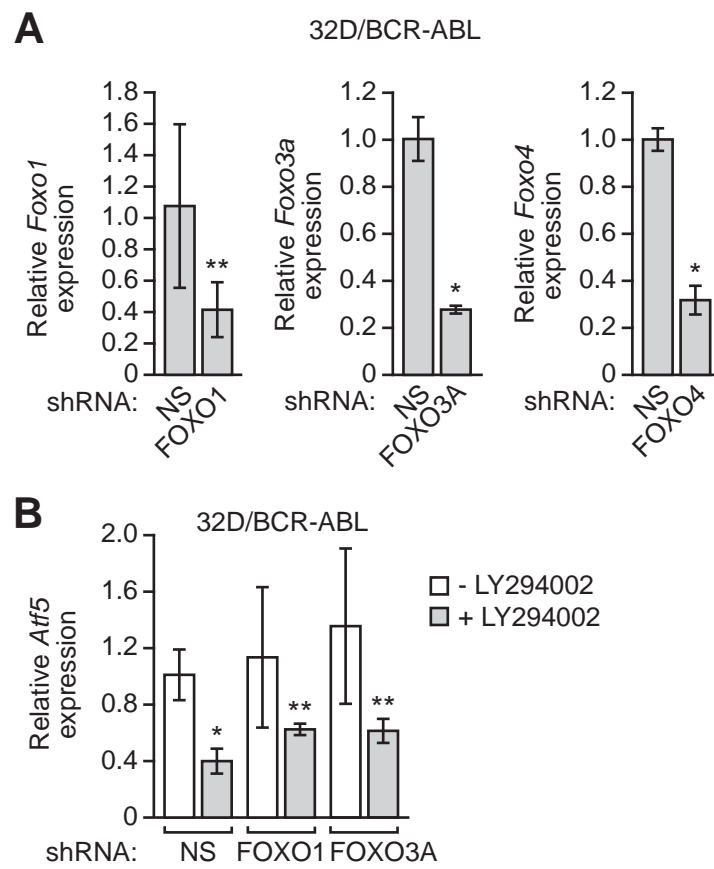

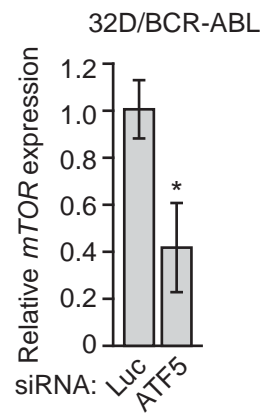

Figure S13

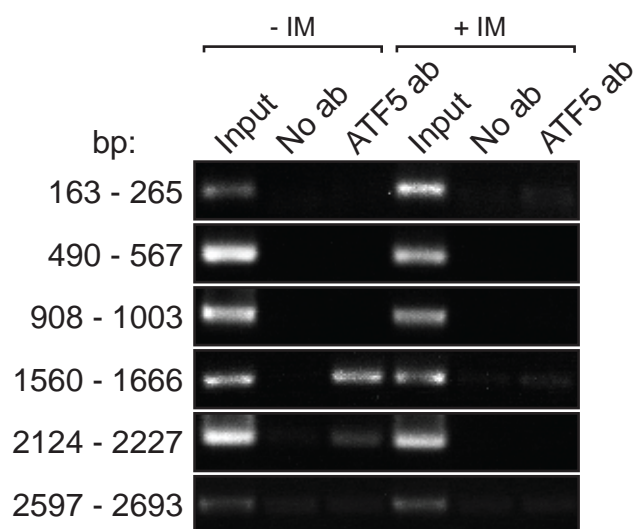

Figure S14

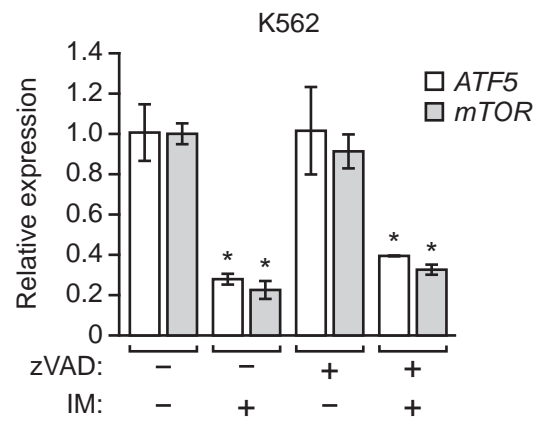

Figure S15

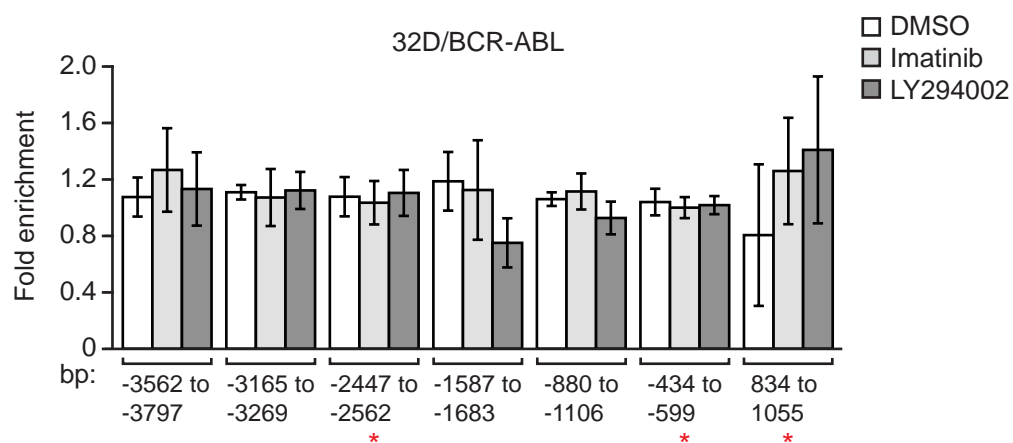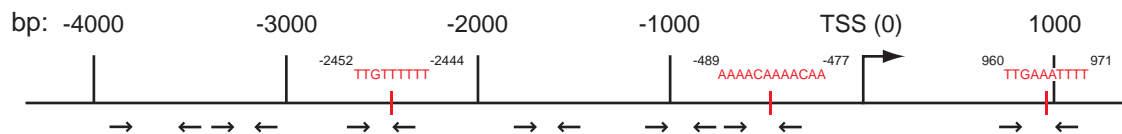

Supplement: supp_blood-2010-12-322537_blood-2010-12-322537-1.pdf [file supp_blood-2010-12-322537_blood-2010-12-322537-1.pdf]
